# Supplementary material
Source: PubMed Central journal article supplement (PMC4282644)

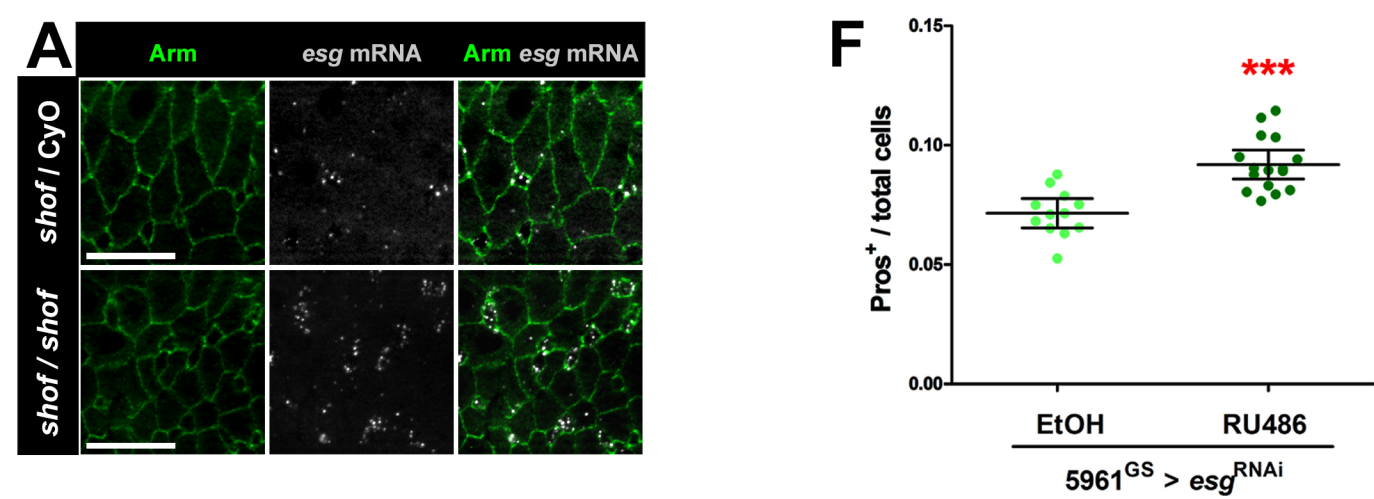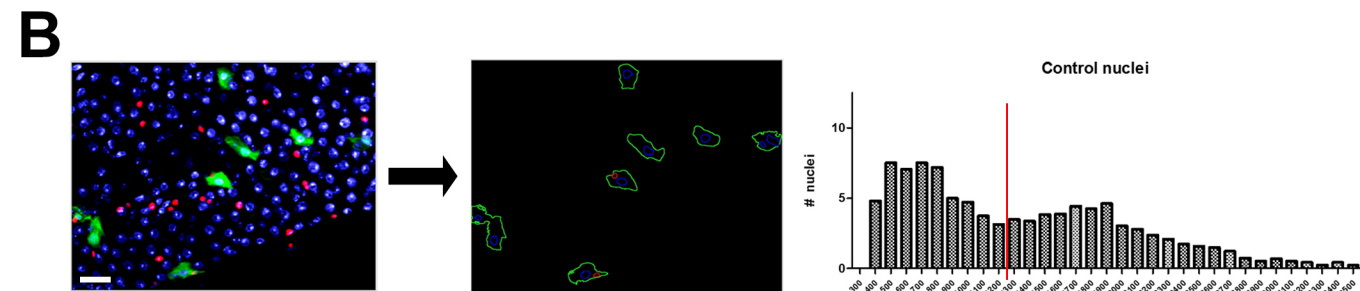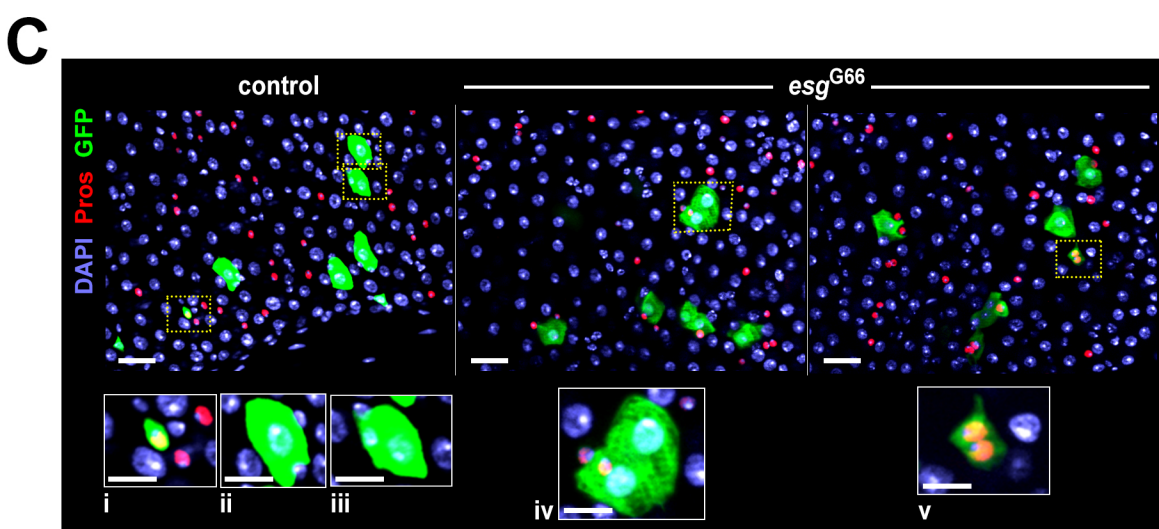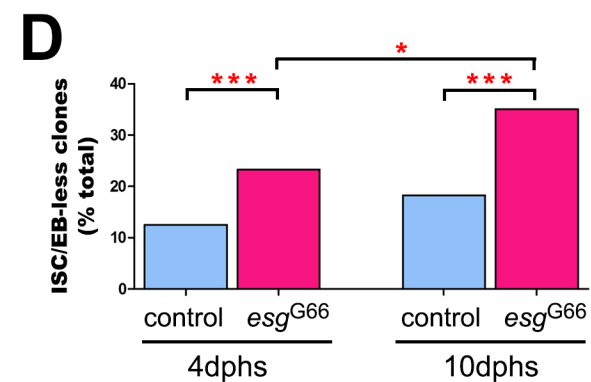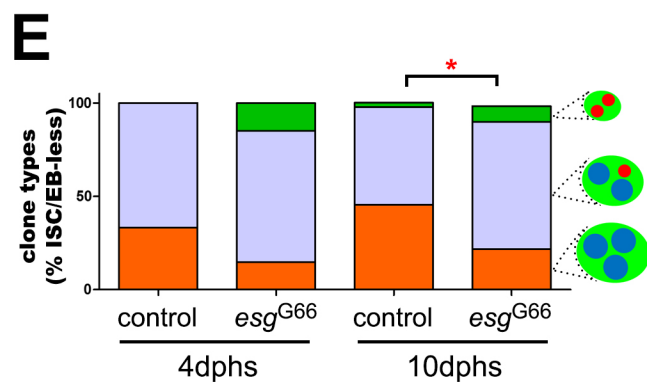

Figure S1

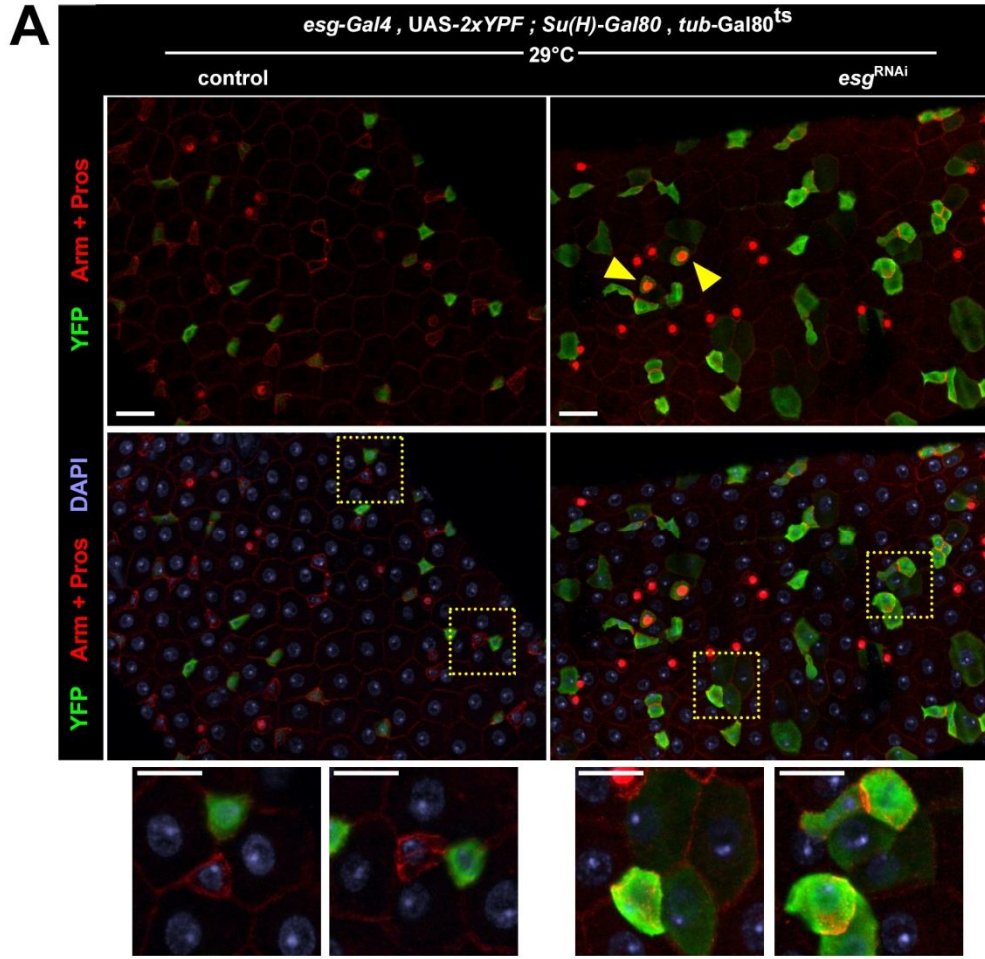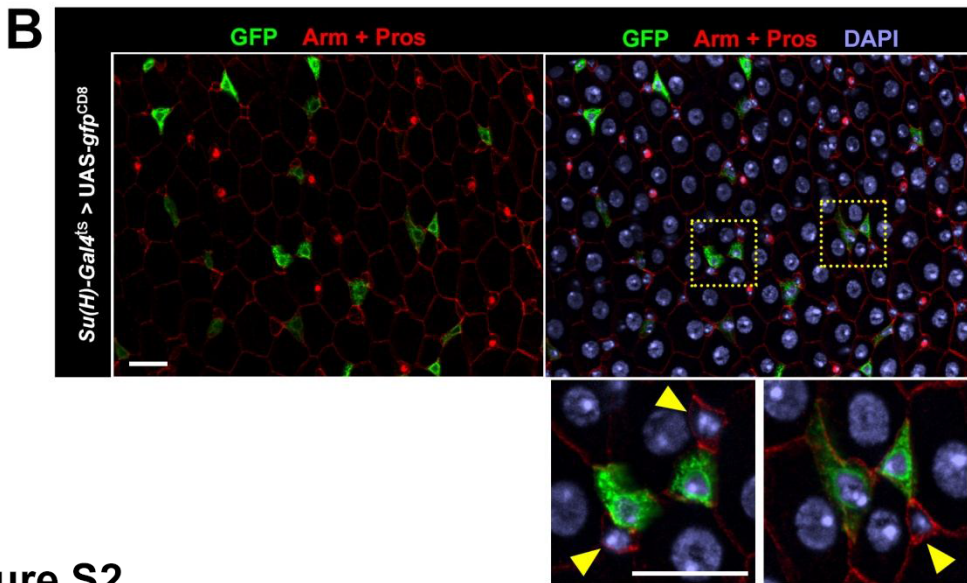

Figure S2

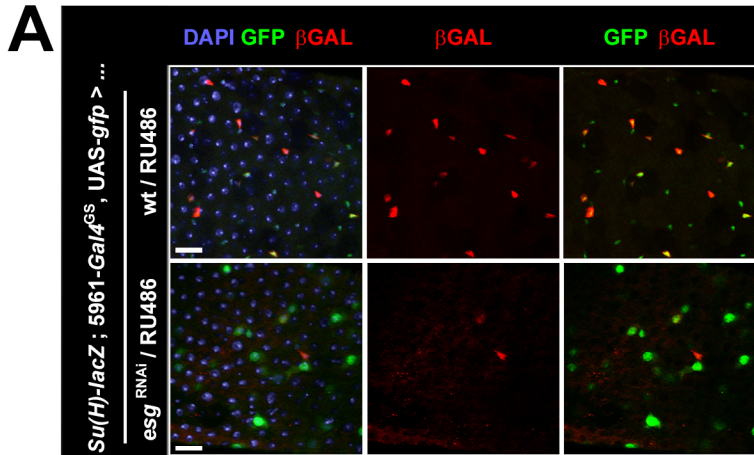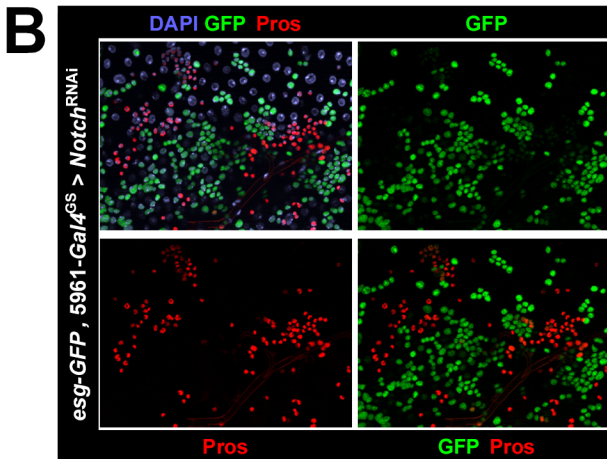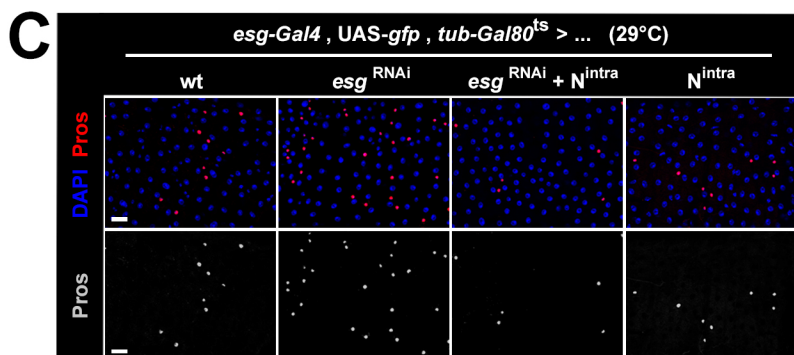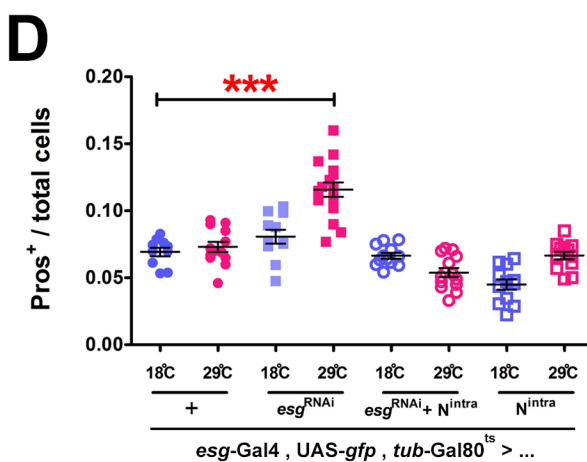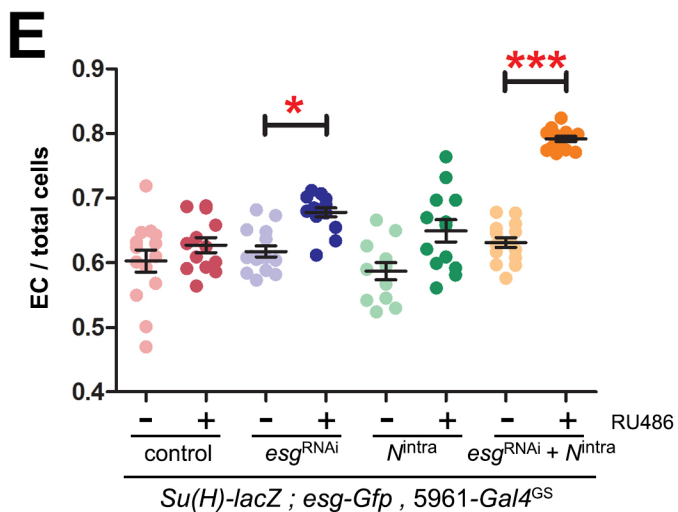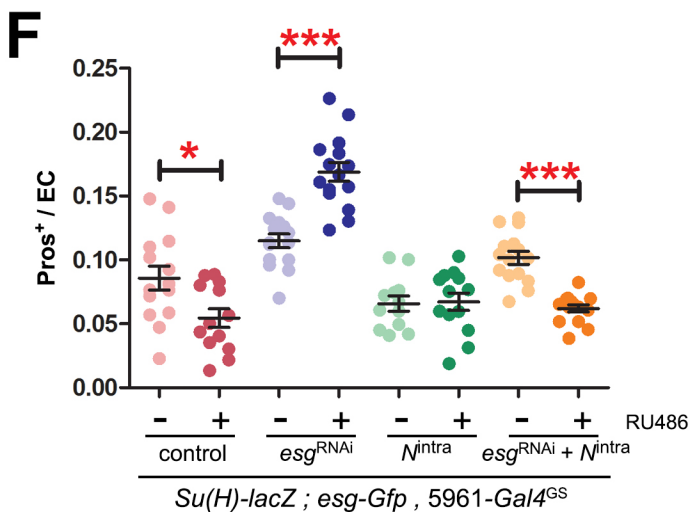

Figure S3

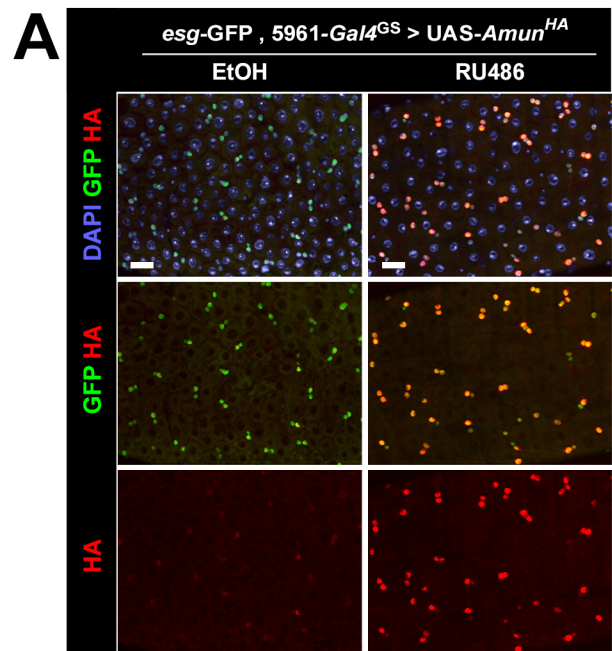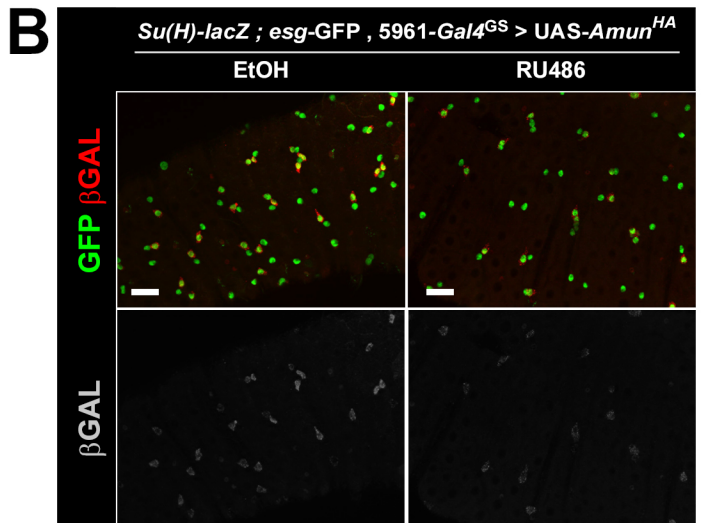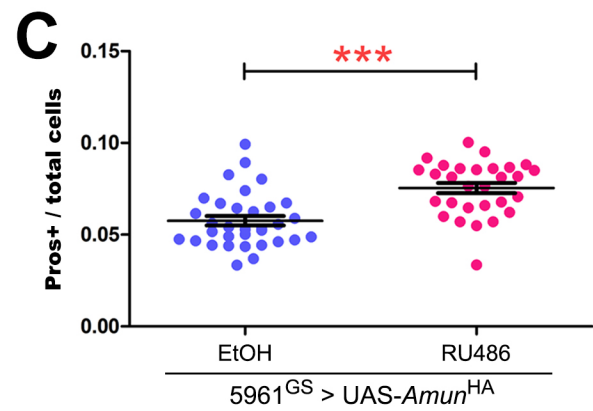

Figure S4

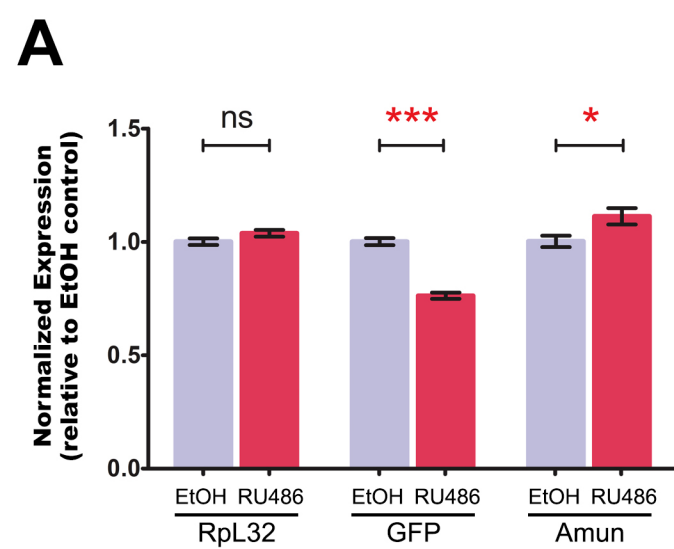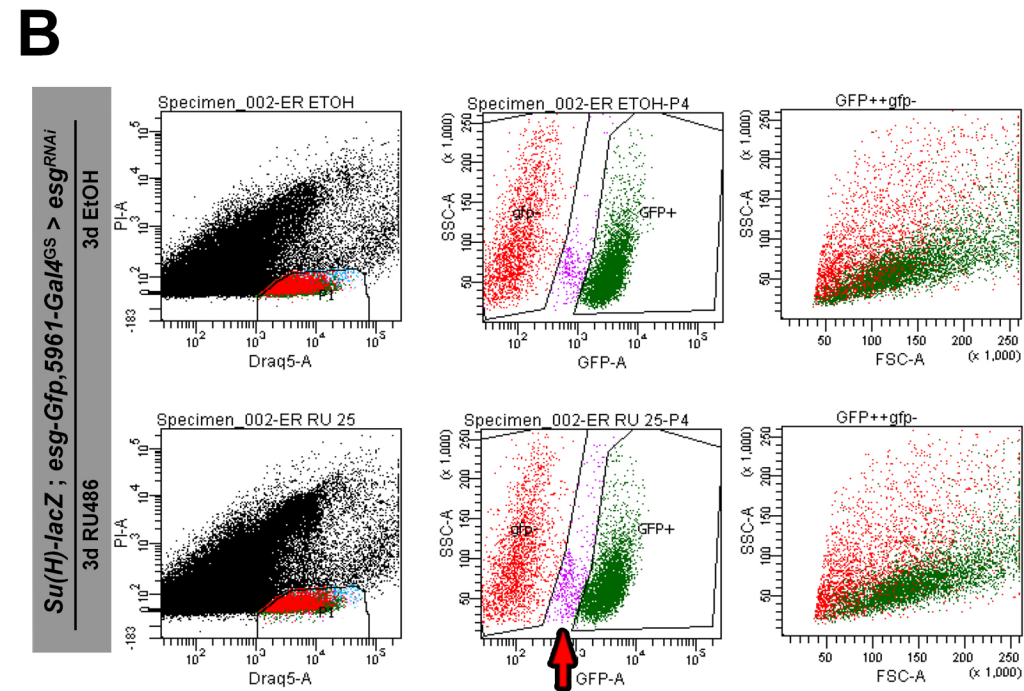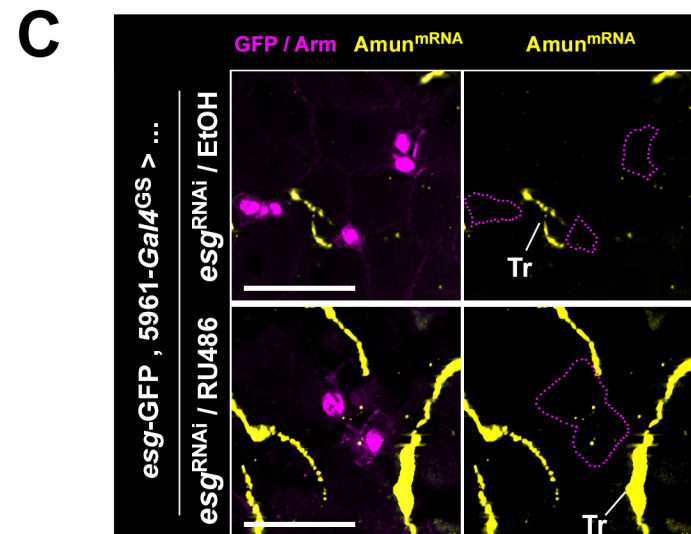

Figure S5

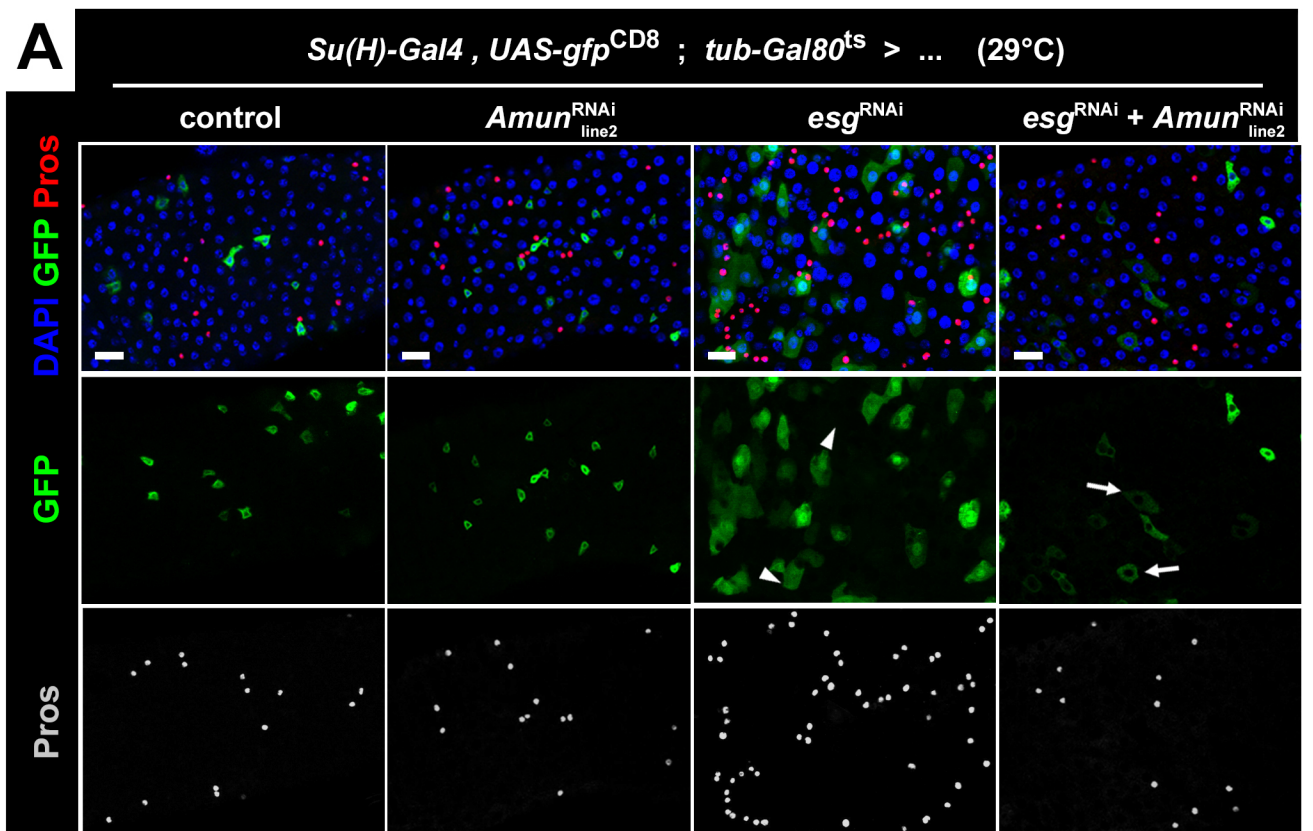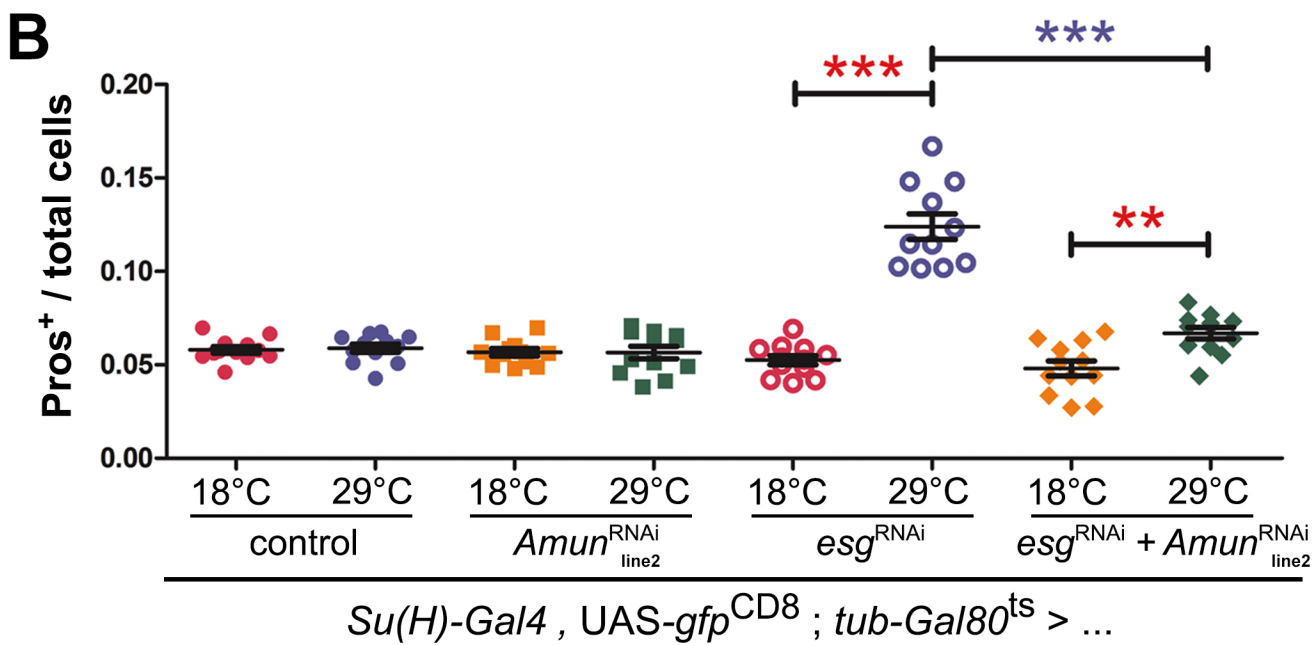

Figure S6

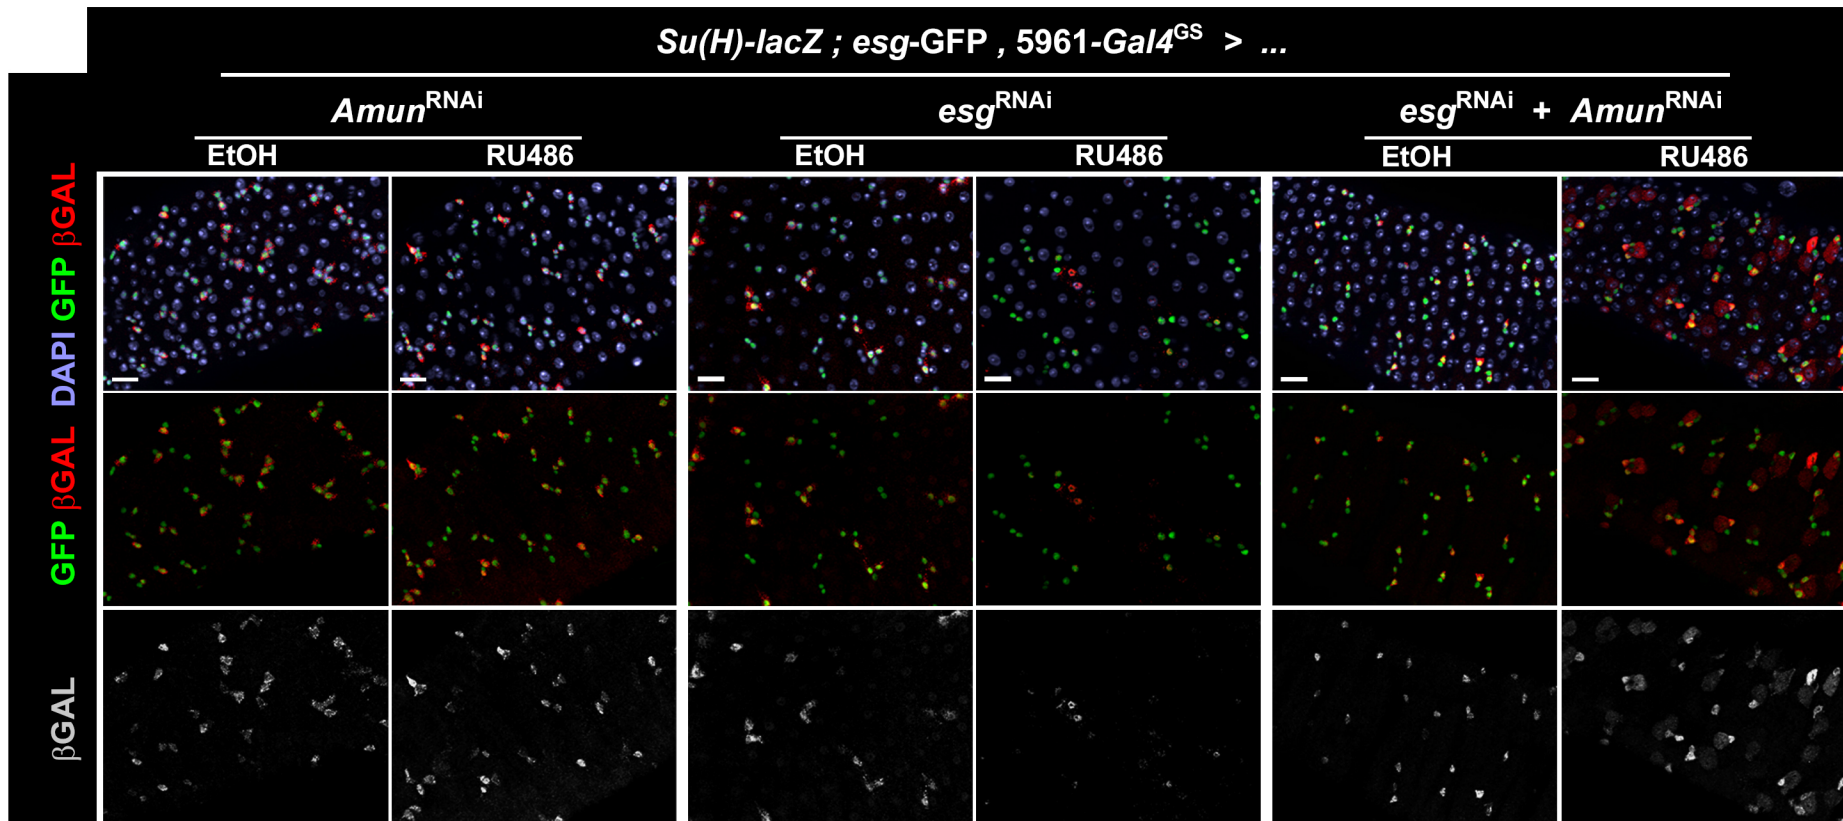

Figure S7

Supplement: embj0033-2983-sd1.pdf [file embj0033-2983-sd1.pdf]
